# Supplementary material for: Yeast-model-based study identified myosin- and calcium-dependent calmodulin signalling as a potential target for drug intervention in chorea-acanthocytosis
Source: PubMed Central journal article supplement (PMC6361151; doi:10.1242/dmm.036830), 2019-01-28
Supplement: dmm-12-036830-s1.pdf [file dmm-12-036830-s1.pdf]

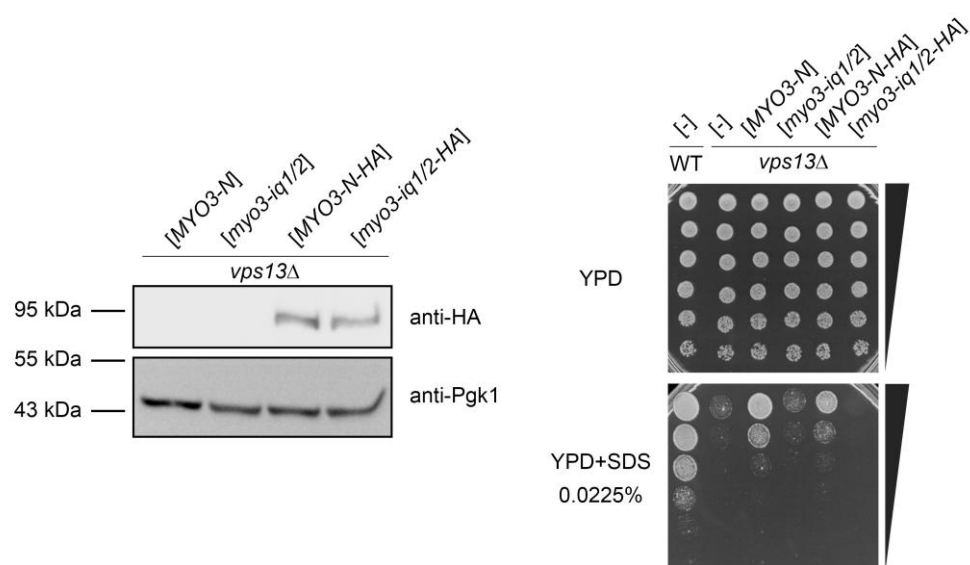

**Fig. S1. *MYO3-N-HA* and *myo3-1q1/2-HA* are similarly expressed and similarly influence *vps13Δ* growth on SDS plates as alleles without the tag.** Western blot analysis of yeast extracts from strains indicated (left panel) and growth of respective strains on SDS plates (right panel). Cells were grown to early exponential phase, cell suspensions were diluted and dropped on plates. The extracts were prepared by alkaline lysis.

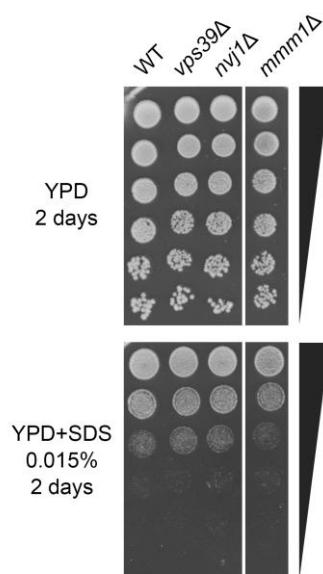

**Fig. S2. Mutants showing defects in various membrane contact sites are not hypersensitive to SDS.** Growth test of indicated mutants was performed. Irrelevant line was removed.

**Table S1. *Saccharomyces cerevisiae* strains used.**

| Strain    | Genotype                                                                                                  | Source or reference              |
|-----------|-----------------------------------------------------------------------------------------------------------|----------------------------------|
| BY4741    | <i>MATa, his3Δ1, leu2Δ0 met15Δ0 ura3Δ0</i>                                                                | Open Biosystem                   |
| BY4742    | <i>MATα, his3Δ1, leu2Δ0 met15Δ0 ura3Δ0</i>                                                                | Open Biosystem                   |
| BY vps13Δ | <i>MATa his3Δ1 leu2Δ0 met15Δ0 ura3Δ0 vps13::kanMX</i>                                                     | Open Biosystem                   |
| BY crz1Δ  | <i>MATa his3Δ1 leu2Δ0 met15Δ0 ura3Δ0 crz1::kanMX</i>                                                      | Open Biosystem                   |
| PS3       | <i>MATa his3Δ1 leu2Δ0 met15Δ0 ura3Δ0 cnb1::kanMX</i>                                                      | This study                       |
| WR11      | <i>MATα LAS17-7Ala-mRFP::HIS3 ura3-52 leu2-3,112 his3Δ200 trp1-1 lys2-801 vps13::URA3</i>                 | This study                       |
| KAY1466   | <i>MATα his3Δ1 leu2Δ0 lys2Δ0 ura3Δ0 ABP1-mCherry::HIS3</i>                                                | Palmer et al. 2015               |
| KAY1931   | <i>MATα his3Δ1 leu2Δ0 lys2Δ0 ura3Δ0 ABP1-mCherry::HIS3 vps13::URA3</i>                                    | This study                       |
| KAY757    | <i>Mat a his3Δ1 leu2Δ ura3Δ met15Δ LAS17-GFP::HIS3</i>                                                    | Invitrogen                       |
| KAY1930   | <i>Mat a his3Δ1 leu2Δ ura3Δ met15Δ LAS17-GFP::HIS3 vps13::URA3</i>                                        | This study                       |
| KAY758    | <i>Mat a his3Δ1 leu2Δ ura3Δ met15Δ MYO3-GFP::HIS3</i>                                                     | Invitrogen                       |
| KAY1939   | <i>Mat a his3Δ1 leu2Δ ura3Δ met15Δ MYO3-GFP::HIS3 vps13::URA3</i>                                         | This study                       |
| KAY1940   | <i>Mat a his3Δ1 leu2Δ ura3Δ met15Δ MYO5-GFP::HIS3</i>                                                     | This study                       |
| KAY1941   | <i>Mat a his3Δ1 leu2Δ ura3Δ met15Δ MYO5-GFP::HIS3 vps13::URA3</i>                                         | This study                       |
| KJK177    | <i>MATa his3Δ1 leu2Δ ura3Δ met15Δ crz1::kanMX vps13::URA3</i>                                             | This study                       |
| PS4       | <i>MATa his3Δ1 leu2Δ ura3Δ met15Δ cnb1::kanMX vps13::URA3</i>                                             | This study                       |
| pJ69-4a   | <i>MATa trp1Δ-901 leu2-3112 ura3-52 his3-Δ200 gal4 Δ gal80Δ GAL2-ADE2 LYS2::GAL1-HIS3 met2::GAL7-lacZ</i> | James et al., 1996               |
| SCMIG1502 | <i>MATα his3Δ leu2Δ lys2Δ ura3Δ osh2Δ::kanMX osh3Δ::KMX</i>                                               | Encinar del Dedo et al., 2017    |
| KJK188    | <i>MATα his3Δ leu2Δ lys2Δ ura3Δ osh2Δ::kanMX osh3Δ::KMX vps13::URA3</i>                                   | This study                       |
| BY ede1Δ  | <i>MATa his3Δ1 leu2Δ0 met15Δ0 ura3Δ0 ede1Δ::kanMX</i>                                                     | Open Biosystems                  |
| BY sla1Δ  | <i>MATa his3Δ1 leu2Δ0 met15Δ0 ura3Δ0 sla1Δ::kanMX</i>                                                     | Open Biosystems                  |
| KAY1482   | <i>MATα his3Δ1 leu2Δ0 lys2Δ ura3Δ0 rvs167Δ::LEU2 GFP-Snc1-SUC2 URA3</i>                                   | Smaczynska-de Rooij et al., 2012 |
| BY end3Δ  | <i>MATα, his3Δ1, leu2Δ0 met15Δ0 ura3Δ0 end3Δ::kanMX</i>                                                   | Open Biosystem                   |
| BY sla2Δ  | <i>MATα, his3Δ1, leu2Δ0 met15Δ0 ura3Δ0 sla2Δ::kanMX</i>                                                   | Open Biosystem                   |
| BY cog5Δ  | <i>MATα, his3Δ1, leu2Δ0 met15Δ0 ura3Δ0 cog5Δ::kanMX</i>                                                   | Open Biosystem                   |
| BY cog8Δ  | <i>MATα, his3Δ1, leu2Δ0 met15Δ0 ura3Δ0 cog8Δ::kanMX</i>                                                   | Open Biosystem                   |
| BY vps15Δ | <i>MATα, his3Δ1, leu2Δ0 met15Δ0 ura3Δ0 vps15Δ::kanMX</i>                                                  | Open Biosystem                   |
| BY vps17Δ | <i>MATα, his3Δ1, leu2Δ0 met15Δ0 ura3Δ0 vps17Δ::kanMX</i>                                                  | Open Biosystem                   |
| BY vps35Δ | <i>MATα, his3Δ1, leu2Δ0 met15Δ0 ura3Δ0 vps35Δ::kanMX</i>                                                  | Open Biosystem                   |
| BY vps27Δ | <i>MATα, his3Δ1, leu2Δ0 met15Δ0 ura3Δ0 vps27Δ::kanMX</i>                                                  | Open Biosystem                   |

|           |                                                          |                |
|-----------|----------------------------------------------------------|----------------|
| BY stp22Δ | <i>MATα, his3Δ1, leu2Δ0 met15Δ0 ura3Δ0 stp22Δ::kanMX</i> | Open Biosystem |
| BY vps36Δ | <i>MATα, his3Δ1, leu2Δ0 met15Δ0 ura3Δ0 vps36Δ::kanMX</i> | Open Biosystem |
| BY vps24Δ | <i>MATα, his3Δ1, leu2Δ0 met15Δ0 ura3Δ0 vps24Δ::kanMX</i> | Open Biosystem |
| BY pmc1Δ  | <i>MATα, his3Δ1, leu2Δ0 met15Δ0 ura3Δ0 pmc1Δ::kanMX</i>  | Open Biosystem |
| BY vps39Δ | <i>MATα, his3Δ1, leu2Δ0 met15Δ0 ura3Δ0 vps39Δ::kanMX</i> | Open Biosystem |
| BY nvj1Δ  | <i>MATα, his3Δ1, leu2Δ0 met15Δ0 ura3Δ0 nvj1Δ::kanMX</i>  | Open Biosystem |
| BY mmm1Δ  | <i>MATα, his3Δ1, leu2Δ0 met15Δ0 ura3Δ0 mmm1Δ::kanMX</i>  | Open Biosystem |

**Table S2. List of plasmids used.**

| Plasmid                                            | Source or reference                 |
|----------------------------------------------------|-------------------------------------|
| pRS415                                             | Sikorski and Hieter, 1989           |
| pRS415-VPS13                                       | Rzepnikowska et al., 2017a          |
| pRS415-vps13-I2749R                                | Rzepnikowska et al., 2017a          |
| pRS425-P <sub>GPD</sub>                            | Sikorski and Hieter, 1989           |
| pRS425-P <sub>GPD</sub> -MYO3-N                    | This study                          |
| pRS425-P <sub>GPD</sub> -MYO3-N( $\Delta$ 680-775) | This study                          |
| pRS425-P <sub>GPD</sub> -myo3-N-iq1                | This study                          |
| pRS425-P <sub>GPD</sub> -myo3-N-iq2                | This study                          |
| pRS425-P <sub>GPD</sub> -myo3-N-iq1/2              | This study                          |
| pYEp181lac                                         | Gietz and Sugino, 1988              |
| pYEp181lac-CMD1                                    | This study                          |
| pYEp181lac-cmd1-226                                | Schaerer-Brodbeck and Riezman, 2003 |
| pYEp181lac-cmd1-228                                | Schaerer-Brodbeck and Riezman, 2003 |
| pYEp181lac-cmd1-231                                | Schaerer-Brodbeck and Riezman, 2003 |
| pYEp181lac-cmd1-239                                | Schaerer-Brodbeck and Riezman, 2003 |
| pAMS363 (CDRE- <i>LacZ</i> )                       | Stathopoulos and Cyert, 1997        |
| pGBT9                                              | Clontech                            |
| pGBT9-MYO3-N                                       | This study                          |
| pGBT9-myo3-iq1/2                                   | This study                          |
| pGAD424                                            | Clontech                            |
| pGAD424-CMD1                                       | This study                          |
| pGAD424-cmd1-226                                   | This study                          |
| pGAD424-cmd1-228                                   | This study                          |
| pGAD424-cmd1-231                                   | This study                          |
| pGAD424-cmd1-239                                   | This study                          |
| pKA475 ( <i>URA3</i> cassette)                     | Smaczynska-de Rooij et al., 2008    |
| pRK107S ( <i>PMCI</i> )                            | Kucharczyk et al., 2000             |
| pRK109S ( <i>PMRI</i> )                            | Kucharczyk et al., 2000             |
| pRS425-P <sub>GPD</sub> -MYO3-N-HA                 | This study                          |
| pRS425-P <sub>GPD</sub> -myo3-N-iq1/2-HA           | This study                          |

B. Kymographs of Las17-GFP, Myo3-GFP and Myo5-GFP patches. Two representative kymographs for each strain, as in A, are shown. Las17-GFP patches were observed for 120 s using an Olympus IX-81 microscope and imaging was performed via 1 s time-lapse. Myo3-GFP and Myo5-GFP were observed for 90 s using an OMX DeltaVision V4 microscope and imaging was performed via 0.5 s time-lapse.

C. Kymographs of Abp1-mCherry patches. Two representative kymographs for each class of patch behavior are shown. Abp1-mCherry patches were viewed for 90 s using an Olympus IX-81 microscope and imaging was performed via 1 s time-lapse. Quantification of the patches was analysed using a two-tailed Student t-test (n=5, patches counted
